# Supplementary material
Source: bioRxiv or medRxiv preprint supplement (http://www.medrxiv.org/highwire/filestream/72538/field_highwire_adjunct_files/5/2020.02.23.20027029-3.pdf)
Supplement: Supplementary file [file 2020.02.23.20027029-3.pdf]

Table S1

| Feature                                                                 | Space                                          | Fasting effect | Recovery effect | Study effect | FDR (intervention model comparison) | Fasting effect size (Cliff's delta) | Fasting FDR (MWU post-hoc, N=3) | Recovery effect size (Cliff's delta) | Recovery FDR (MWU post-hoc, N=3) | Study effect size (Cliff's delta) | Study FDR (MWU post-hoc, N=3) |
|-------------------------------------------------------------------------|------------------------------------------------|----------------|-----------------|--------------|-------------------------------------|-------------------------------------|---------------------------------|--------------------------------------|----------------------------------|-----------------------------------|-------------------------------|
| Coprococcus comes [ref_mOTU_v2_4313]                                    | Microbiome-Taxonomy-OTU-mOTU2-rar              | YES-DEPLETED   | YES-ENRICHED    | NS           | 0.034                               | -0.652                              | 0.002                           | 0.478                                | 0.034                            | 0.000                             | 0.225                         |
| Erysipelotrichaceae sp._C Coprobacillus_Erysipelatoclostridium ramosum_ | Microbiome-Taxonomy-Species-mOTU2-YES-ENRICHED | YES-DEPLETED   | NS              |              | 0.031                               | 0.522                               | 0.014                           | -0.478                               | 0.021                            | 0.130                             | 0.583                         |
| Anaerotruncus colliformis [ref_mOTU_v2_0884]                            | Microbiome-Taxonomy-OTU-mOTU2-rar              | YES-ENRICHED   | NS              | NS           | 0.041                               | 0.348                               | 0.045                           | -0.087                               | 0.222                            | 0.261                             | 0.061                         |
| unknown Clostridiales [meta_mOTU_v2_5805]                               | Microbiome-Taxonomy-OTU-mOTU2-rar              | NS             | YES-ENRICHED    | NS           | 0.006                               | -0.348                              | 0.050                           | 0.652                                | 0.002                            | 0.217                             | 0.255                         |
| Bacteroides dorei/vulgatus [ref_mOTU_v2_0898]                           | Microbiome-Taxonomy-OTU-mOTU2-rar              | NS             | YES-DEPLETED    | NS           | 0.003                               | 0.261                               | 0.090                           | -0.348                               | 0.021                            | -0.174                            | 0.436                         |
| Actinomyces sp_ICM39 [ref_mOTU_v2_0376]                                 | Microbiome-Taxonomy-OTU-mOTU2-rar              | NS             | YES-DEPLETED    | NS           | 0.007                               | 0.130                               | 0.097                           | -0.391                               | 0.020                            | -0.174                            | 0.097                         |
| Clostridium_asparagiforme                                               | Microbiome-Taxonomy-Species-mOTU2-YES-ENRICHED | NS             | NS              |              | 0.071                               | 0.348                               | 0.036                           | -0.174                               | 0.304                            | 0.130                             | 0.368                         |
| Actinomycetaceae                                                        | Microbiome-Taxonomy-Family-mOTU2-r             | NS             | YES-DEPLETED    | YES-DEPLETED | 0.000                               | 0.087                               | 0.525                           | -0.478                               | 0.003                            | -0.435                            | 0.005                         |
| Actinomyces sp_ICM39                                                    | Microbiome-Taxonomy-Species-mOTU2-NS           | YES-DEPLETED   | NS              |              | 0.005                               | 0.130                               | 0.097                           | -0.391                               | 0.020                            | -0.174                            | 0.097                         |
| Alistipes obesi                                                         | Microbiome-Taxonomy-Species-mOTU2-NS           | YES-ENRICHED   | NS              |              | 0.005                               | -0.261                              | 0.420                           | 0.565                                | 0.036                            | 0.304                             | 0.352                         |
| Dialister invisus                                                       | Microbiome-Taxonomy-Species-mOTU2-YES-DEPLETED | YES-ENRICHED   | NS              |              | 0.003                               | -0.391                              | 0.022                           | 0.304                                | 0.022                            | -0.130                            | 0.824                         |
| Roseburia hominis                                                       | Microbiome-Taxonomy-Species-mOTU2-YES-ENRICHED | YES-DEPLETED   | NS              |              | 0.034                               | 0.565                               | 0.005                           | -0.435                               | 0.030                            | 0.304                             | 0.333                         |
| Anaerotruncus                                                           | Microbiome-Taxonomy-Genus-mOTU2-r              | YES-ENRICHED   | NS              | YES-ENRICHED | 0.065                               | 0.391                               | 0.027                           | -0.130                               | 0.159                            | 0.304                             | 0.037                         |
| Bacteria class incertae sedis                                           | Microbiome-Taxonomy-Class-mOTU2-rar            | NS             | YES-DEPLETED    | NS           | 0.092                               | 0.130                               | 0.478                           | -0.435                               | 0.013                            | -0.261                            | 0.118                         |
| unknown Clostridium [meta_mOTU_v2_6792]                                 | Microbiome-Taxonomy-OTU-mOTU2-rar              | YES-ENRICHED   | YES-DEPLETED    | NS           | 0.006                               | 0.565                               | 0.012                           | -0.522                               | 0.012                            | 0.087                             | 0.861                         |
| Coprococcus comes                                                       | Microbiome-Taxonomy-Species-mOTU2-YES-DEPLETED | YES-ENRICHED   | NS              |              | 0.026                               | -0.652                              | 0.002                           | 0.478                                | 0.034                            | 0.000                             | 0.225                         |
| unknown Clostridiales [meta_mOTU_v2_7014]                               | Microbiome-Taxonomy-OTU-mOTU2-rar              | YES-ENRICHED   | YES-DEPLETED    | NS           | 0.053                               | 0.478                               | 0.016                           | -0.391                               | 0.049                            | 0.174                             | 0.068                         |
| Eubacterium sp_CAG:274                                                  | Microbiome-Taxonomy-Species-mOTU2-YES-ENRICHED | YES-DEPLETED   | NS              |              | 0.063                               | 0.261                               | 0.031                           | -0.261                               | 0.031                            | -0.087                            | 0.760                         |
| Roseburia sp_40_7 [meta_mOTU_v2_6875]                                   | Microbiome-Taxonomy-OTU-mOTU2-rar              | YES-DEPLETED   | YES-ENRICHED    | NS           | 0.041                               | -0.348                              | 0.047                           | 0.348                                | 0.047                            | 0.217                             | 0.570                         |
| Roseburia sp_40_7                                                       | Microbiome-Taxonomy-Species-mOTU2-YES-DEPLETED | YES-ENRICHED   | NS              |              | 0.032                               | -0.348                              | 0.047                           | 0.348                                | 0.047                            | 0.217                             | 0.570                         |
| Dialister invisus [ref_mOTU_v2_4598]                                    | Microbiome-Taxonomy-OTU-mOTU2-rar              | YES-DEPLETED   | YES-ENRICHED    | NS           | 0.065                               | -0.391                              | 0.027                           | 0.261                                | 0.031                            | -0.043                            | 1.000                         |
